# Supplementary material
Source: HighWire-hosted journal article supplement (https://cmajopen.ca/highwire/filestream/81109/field_highwire_adjunct_files/0/2018-0043-1-at.pdf)
Supplement: 2018-0043-1-at.pdf [file 2018-0043-1-at.pdf]

**Appendix 1 (as supplied by the authors): Supplementary tables**

**Supplementary Table A1: Chest radiographic information from the Immigration Medical Exam (IME) in children who were treated for TB**

| Available information    | All treated patients<br>(n=138) | CXR at time of diagnosis<br>(n=67) |
|--------------------------|---------------------------------|------------------------------------|
| “Abnormal”               | 51 (37.0%)                      | 38 (56.7%)                         |
| Hilar changes            | 14 (10.1%)                      | 12 (17.9%)                         |
| “Primary complex/ Kochs” | 13 (9.4%)                       | 6 (9.0%)                           |
| Normal                   | 52 (37.7%)                      | 11 (16.4%)                         |
| Peribronchial thickening | 1 (0.7%)                        |                                    |
| Parenchymal/Pneumonia    | 4 (2.9%)                        |                                    |
| Other                    | 3 (2.2%)                        |                                    |

\*Other: cyst, blunting of angles

**Supplementary Table A2: Results of review by SickKids radiologist of available chest radiographs taken from the country of origin**

| Outside Films                            | n=27       |
|------------------------------------------|------------|
| Poor quality                             | 4 (14.8%)  |
| Normal: 2 views                          | 11 (40.7%) |
| Normal: single view                      | 1 (3.7%)   |
| Nonspecific lower airway inflammation    | 7 (25.9%)  |
| Airspace disease without lymphadenopathy | 2 (7.4%)   |
| Possible bronchiectasis                  | 1 (3.7%)   |
| Intrathoracic lymphadenopathy            | 1 (3.7%)   |
| Total                                    | 27         |

\*Median interval from outside chest radiograph and SickKids chest radiograph was 0.91 years.
